# Supplementary material for: Synthesis of hollow cobalt oxide nanopowders by a salt-assisted spray pyrolysis process applying nanoscale Kirkendall diffusion and their electrochemical properties
Source: Royal Society of Chemistry journal article supplement (doi:10.1039/c5cp06206c), 2015-01-01
Supplement: c5cp06206c1.pdf [file c5cp06206c1.pdf]

## Supporting Information

### **Synthesis of hollow cobalt oxide nanopowders by salt-assisted spray pyrolysis process applying nanoscale Kirkendall diffusion and their electrochemical properties**

Hyeon Seok Ju<sup>a</sup>, Jung Sang Cho<sup>a</sup>, Jong Hwa Kim<sup>b</sup>, Yun Ju Choi<sup>c</sup>,

and Yun Chan Kang<sup>a,\*</sup>

<sup>a</sup>Department of Materials Science and Engineering, Korea University, Anam-Dong,  
Seongbuk-Gu, Seoul 136-713, Republic of Korea

<sup>b</sup>Daegu Center, Korea Basic Science Institute, 80 Daehakro Bukgu, Daegu 702-701,  
Republic of Korea

<sup>c</sup>Suncheon Center, Korea Basic Science Institute, Suncheon 540-742, Republic of Korea  
E-mail: yckang@korea.ac.kr

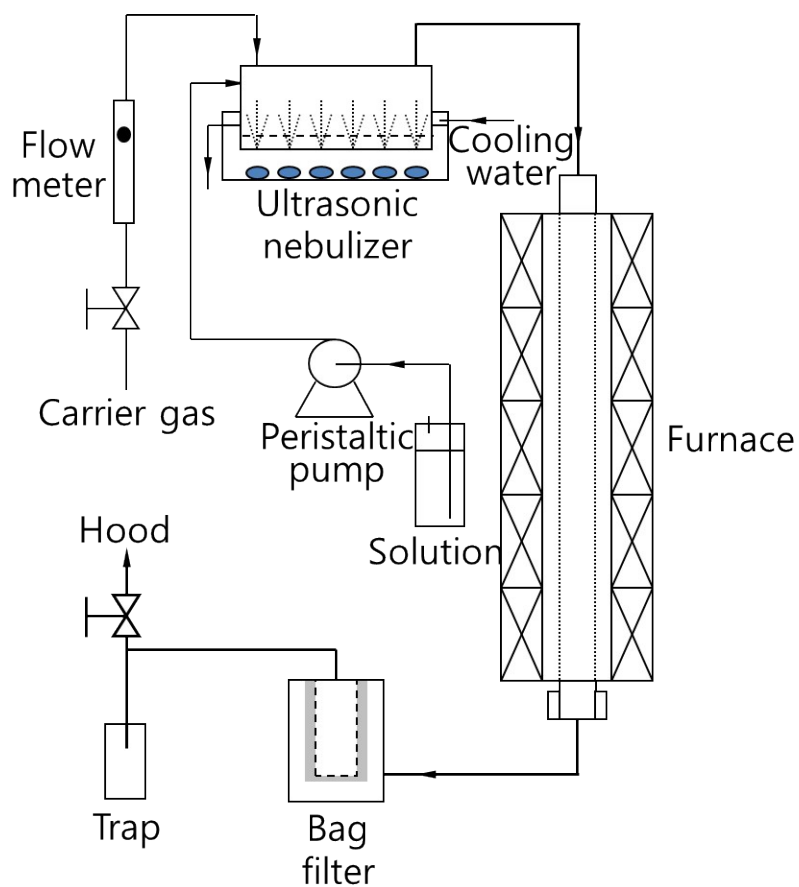

Figure S1. Schematic diagram of the ultrasonic spray pyrolysis system.

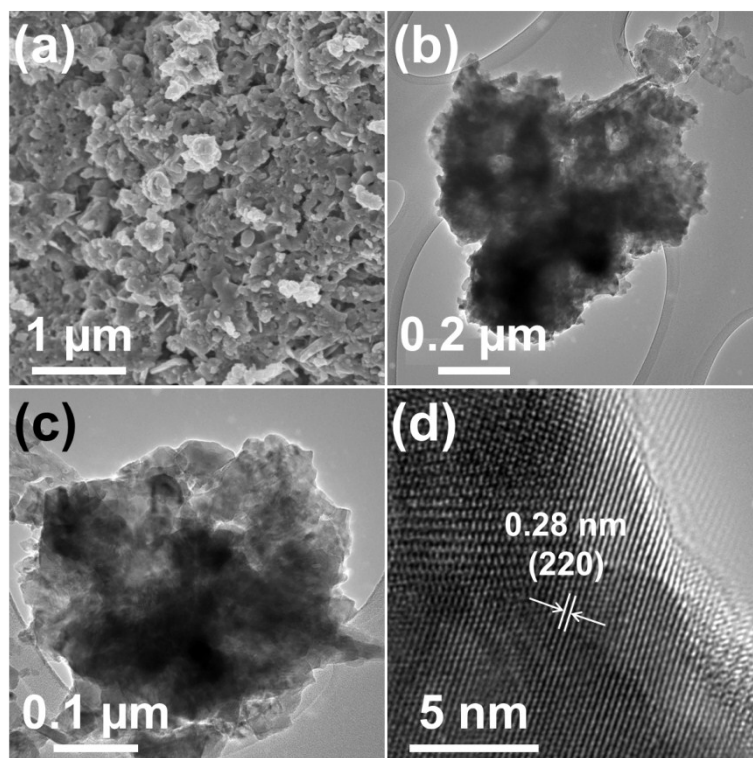

Figure S2. Morphologies of the nanopowders obtained by post-treatment of the metallic Co nanopowder under air atmosphere at a temperature of 300 °C: (a) SEM image, (b) and (c) TEM images, and (d) high resolution TEM image.

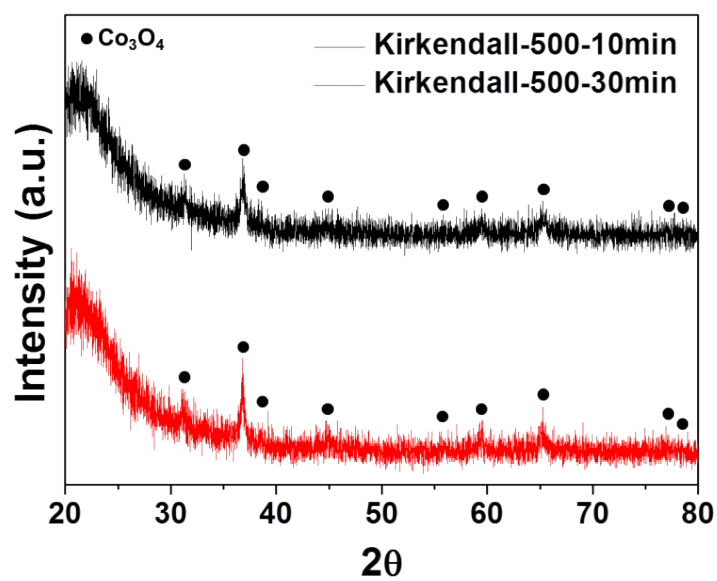

**Figure S3.** XRD patterns of the powders obtained after post-treatment for different oxidation time of the metallic Co nanopowders under air atmosphere at a temperature of 500 °C.

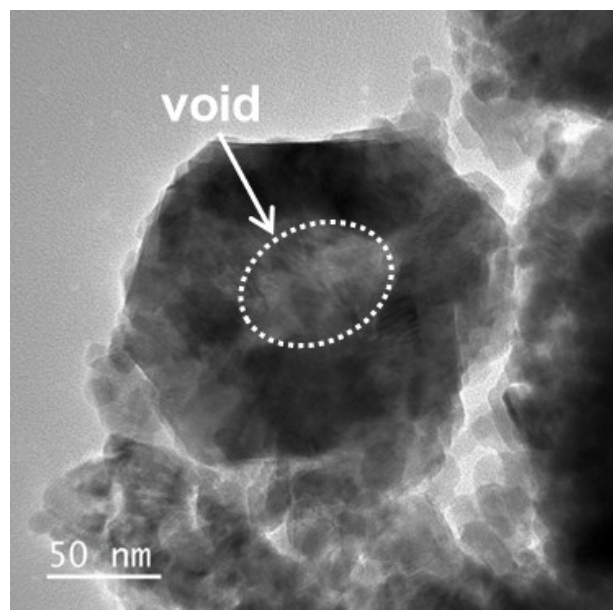

**Figure S4.** TEM image of the powder obtained after post-treatment for 10 min of the metallic Co nanopowders under air atmosphere at a temperature of 500 °C.

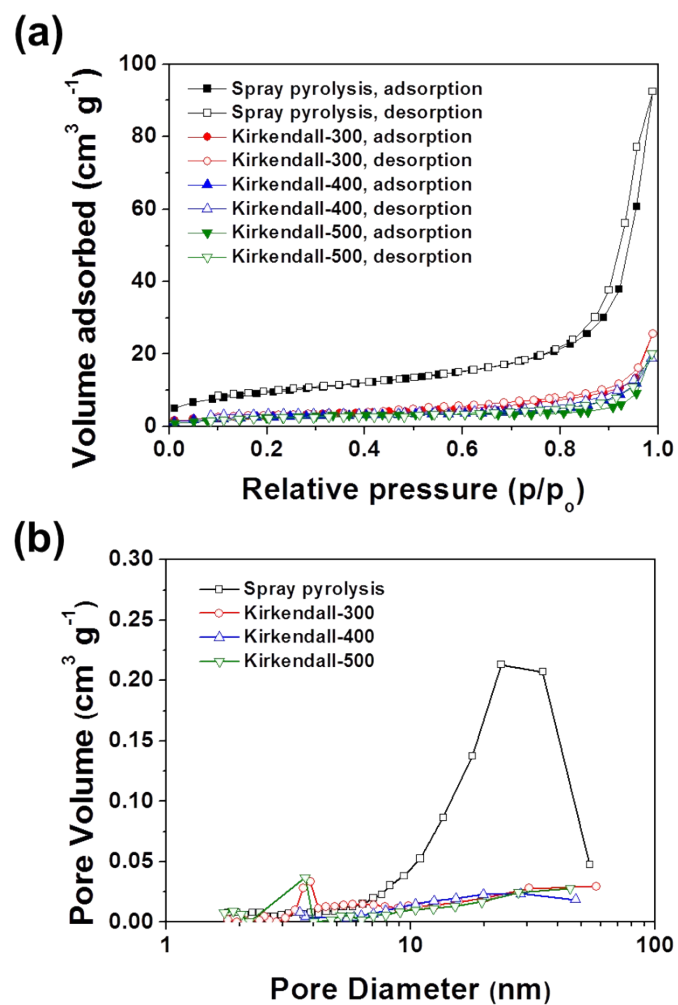

**Figure S5.**  $\text{N}_2$  adsorption and desorption isotherms and BJH pore size distributions of the hollow and filled  $\text{Co}_3\text{O}_4$  nanopowders.

**Table S1.** Comparison of the electrochemical performances of the hollow Co<sub>3</sub>O<sub>4</sub> nanopowders prepared by nanoscale Kirkendall diffusion process with the reported results of the nanostructured cobalt oxide materials.

| Materials                                                                        | Voltage range (V) | Current rate            | Initial C <sub>dis</sub> /C <sub>cha</sub> [mA h g <sup>-1</sup> ] | Discharge capacity [mA h g <sup>-1</sup> ] | Cycle number | Ref          |
|----------------------------------------------------------------------------------|-------------------|-------------------------|--------------------------------------------------------------------|--------------------------------------------|--------------|--------------|
| Co <sub>3</sub> O <sub>4</sub> hollow nanopowders                                | 0.001-3           | 1000 mA g <sup>-1</sup> | 1182/882                                                           | 775                                        | 150          | In this work |
| Co <sub>3</sub> O <sub>4</sub> nanoparticle                                      | 0.01-3            | 178 mA g <sup>-1</sup>  | 1237/835                                                           | ~150                                       | 100          | [40]         |
| Co <sub>3</sub> O <sub>4</sub> nanowire                                          | 0.01-3            | 110 mA g <sup>-1</sup>  | 1027/755                                                           | 611                                        | 50           | [41]         |
| Co <sub>3</sub> O <sub>4</sub> nanoparticle                                      | 0.01-3            | 30 mA g <sup>-1</sup>   | 1334/~1070                                                         | 407                                        | 100          | [42]         |
| Plate-like Co <sub>3</sub> O <sub>4</sub>                                        | 0.02-3            | 178 mA g <sup>-1</sup>  | 1228/870                                                           | 618                                        | 30           | [43]         |
| Hollow Co <sub>3</sub> O <sub>4</sub> @C sphere nanoparticle                     | 0.01-3            | 74 mA g <sup>-1</sup>   | ~1050/732                                                          | 750                                        | 20           | [44]         |
| Nanosized Co <sub>3</sub> O <sub>4</sub>                                         | 0.01-3            | 220 mA g <sup>-1</sup>  | 1411/931                                                           | 913                                        | 20           | [S1]         |
| Co <sub>3</sub> O <sub>4</sub> Hollow microsphere                                | 0.01-3            | 60 mA g <sup>-1</sup>   | 1241/1061                                                          | 633                                        | 25           | [S2]         |
| Meso- and macro-porous Co <sub>3</sub> O <sub>4</sub> -carbon composite powders  | 0.01-3            | 1400 mA g <sup>-1</sup> | ~1150/~920                                                         | 644                                        | 100          | [S3]         |
| Mesoporous Co <sub>3</sub> O <sub>4</sub> cubes                                  | 0.01-3            | 89 mA g <sup>-1</sup>   | 1298/986                                                           | 980                                        | 60           | [S4]         |
| Co <sub>3</sub> O <sub>4</sub> @graphene nanocomposite                           | 0.01-3            | 50 mA g <sup>-1</sup>   | 1097/~753                                                          | ~935                                       | 30           | [S5]         |
| Co <sub>3</sub> O <sub>4</sub> -nanobubble-decorated RGO spheres                 | 0.001-3           | 2000 mA g <sup>-1</sup> | 1471/~1050                                                         | 1156                                       | 200          | [S6]         |
| Multishelled Co <sub>3</sub> O <sub>4</sub> hollow microspheres (triple-shelled) | 0.05-3            | 50 mA g <sup>-1</sup>   | 2064/~1600                                                         | 1616                                       | 30           | [S7]         |

(1 C = 890 mA g<sup>-1</sup>)

## References

- (S1) Z. Yuan, F. Huang, C. Feng, J. Sun and Y. Zhou, *Materials Chemistry and Physics*, 2003, **79**, 1-4.
- (S2) Y. Liu and X. Zhang, *Electrochimica Acta*, 2009, **54**, 4180-4185.
- (S3) J. H. Kim and Y. C. Kang, *Nanoscale*, 2014, **6**, 4789-4795.
- (S4) G. Huang, S. Xu, S. Lu, L. Li, and H. Sun, *ACS Appl. Mater. Interfaces*, 2014, **6**, 7236-7243.
- (S5) Z. S. Wu, W. Ren, L. Wen, L. Gao, J. Zhao, Z. Chen, G. Zhou, F. Li and H. M. Cheng, *ACS Nano*, 2010, **4**, 3187-3194.
- (S6) G. D. Park, J. S. Cho and Y. C. Kang, *Nano Energy*, 2015, **17**, 17-26.
- (S7) J. Wang, N. Yang, H. Tang, Z. Dong, Q. Jin, M. Yang, D. Kisailus, H. Zhao, Z. Tang and D. Wang, *Angew. Chem.*, 2013, **125**, 6545-6548.
